# Supplementary material for: The Effect of Intensity, Frequency, Duration and Volume of Physical Activity in Children and Adolescents on Skeletal Muscle Fitness: A Systematic Review and Meta-Analysis of Randomized Controlled Trials
Source: MDPI journal article supplement (doi:10.3390/ijerph18189640), 2021-09-13

**Table S1.** Coding for energy expenditure of non-resistance training.

| Author, year           | Intensity | Physical activity                                                                  | 2011 Compendium of Physical Activities                                                                                                            |     |
|------------------------|-----------|------------------------------------------------------------------------------------|---------------------------------------------------------------------------------------------------------------------------------------------------|-----|
|                        |           |                                                                                    | Activity                                                                                                                                          | MET |
| Alves, 2016            | High      | 20 m shuttle run exercise and strength training                                    | 02040, circuit training, including kettlebells, some aerobic movement with minimal rest, general, vigorous intensity                              | 8   |
| Faigenbaum, 2015       | High      | FIT program                                                                        | 02040, circuit training, including kettlebells, some aerobic movement with minimal rest, general, vigorous intensity                              | 8   |
| Ferrete, 2014          | High      | Strength and high-intensity training program.                                      | 02020, calisthenics (e.g., push ups, sit ups, pull-ups, jumping jacks), vigorous effort                                                           | 8   |
| Granacher, 2011        | Moderate  | Balance exercises                                                                  | 02035, circuit training, moderate effort                                                                                                          | 4.3 |
| Justin, 2014           | High      | Football game                                                                      | 15210, football, competitive                                                                                                                      | 8   |
| Lubans, 2010           | High      | Elastic tubing exercises and free weights exercises                                | 02050, resistance training (weight lifting, free weight, nautilus or universal), power lifting or body building, vigorous effort (Taylor Code 210 | 6   |
| Mayorga-Vega, 2016     | Moderate  | e.g. strength games, running games, circuit training, multi-jumps, or multi-throws | 05180, walking/running, playing with child(ren), vigorous effort, only active periods                                                             | 5.8 |
| Rodríguez-Rosell, 2016 | Moderate  | strength training                                                                  | 02052, resistance (weight) training, squats , slow or explosive effort                                                                            | 5   |
| St Laurent, 2018       | High      | suspension-training movement program                                               | 02020, calisthenics (e.g., push ups, sit ups, pull-ups, jumping jacks), vigorous effort                                                           | 8   |
| Yohei, 2013            | Moderate  | a body mass-based squat movement                                                   | 02052, resistance (weight) training, squats , slow or explosive effort                                                                            | 5   |

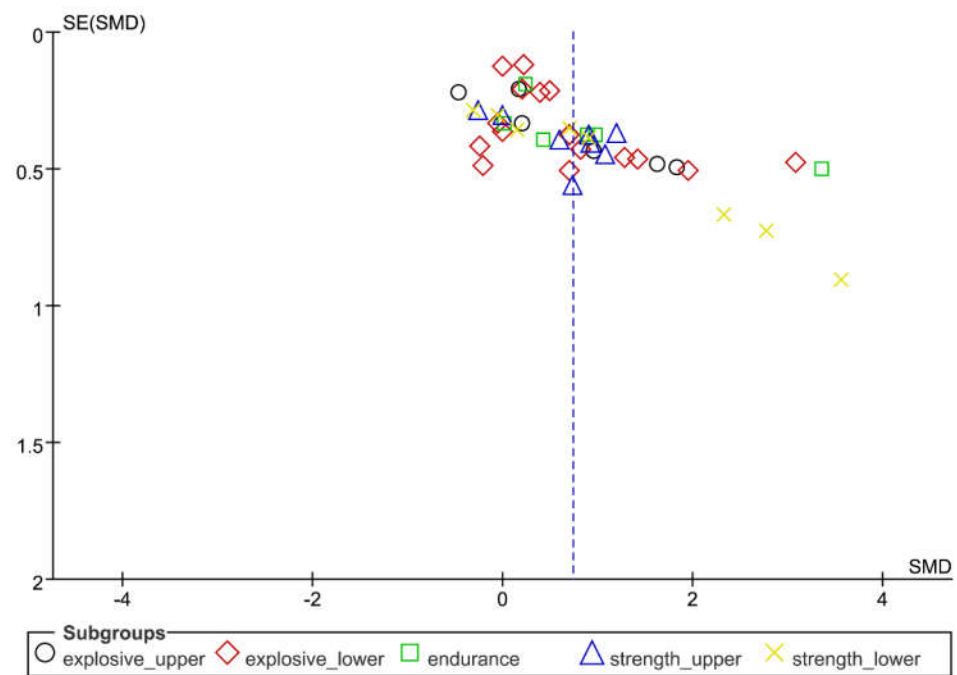

Supplement: s1 [file s1]
